# Supplementary material
Source: PubMed Central journal article supplement (PMC1413618)

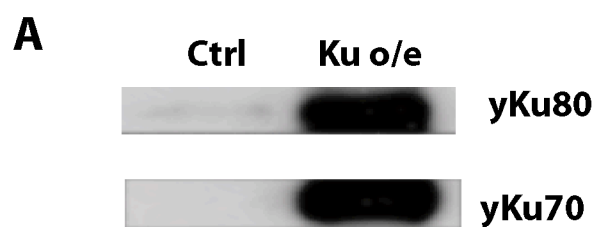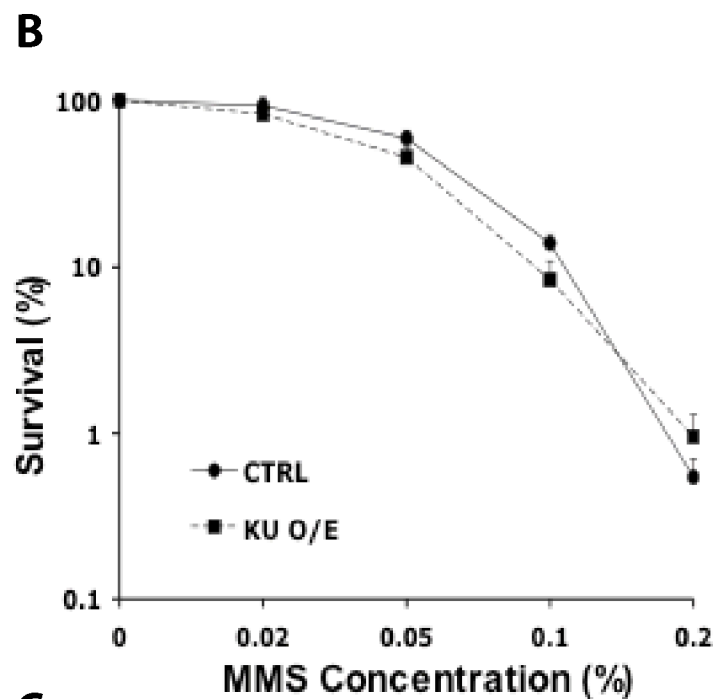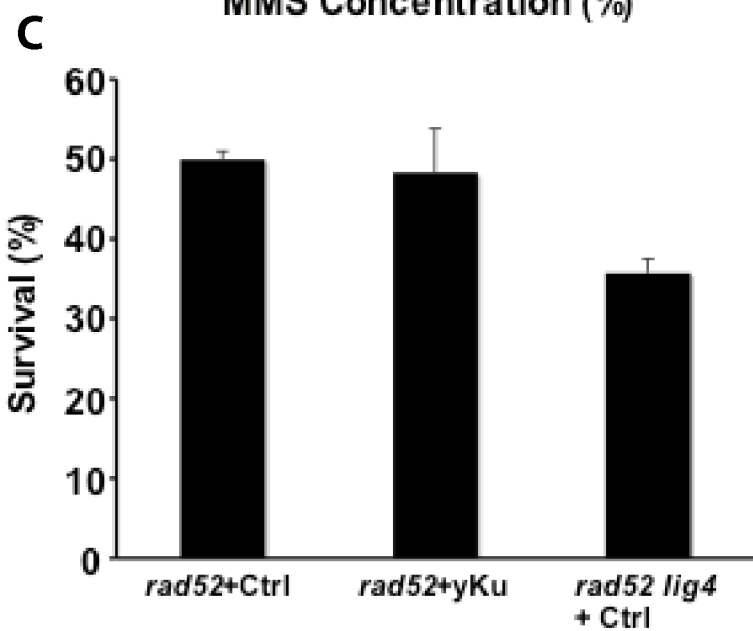

Supplement: pnas_0504063102_1.pdf [file pnas_0504063102_1.pdf]

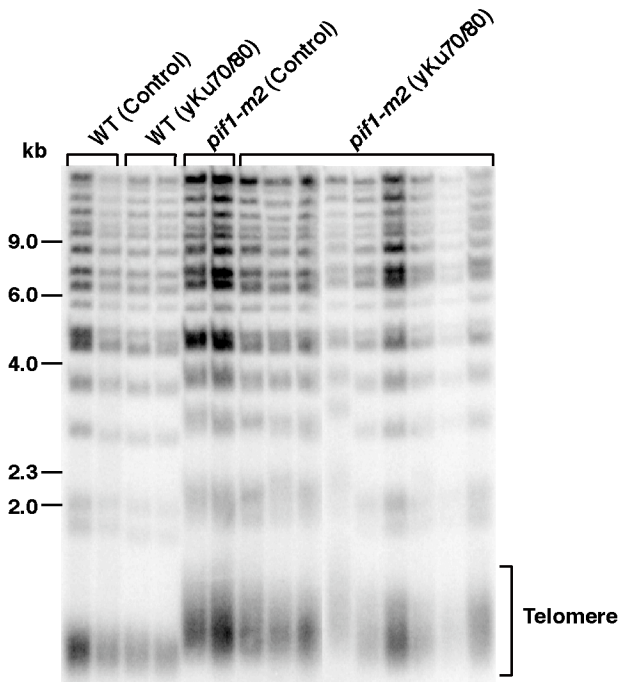

Supplement: pnas_0504063102_2.pdf [file pnas_0504063102_2.pdf]
